# Supplementary material for: First steps towards mitochondrial pan-genomics: detailed analysis of Fusarium graminearum mitogenomes
Source: PubMed Central journal article supplement (PMC6304159; doi:10.7717/peerj.5963), 2018-12-19
Supplement: peerj-06-5963-s003.pdf [file peerj-06-5963-s003.pdf]

## 1 ASSEMBLY OF THE POOLED DATA

2 GRABb (Brankovics et al., 2016) was used with SPAdes 3.8.1 assembler (Bankevich et al., 2012; Nurk  
3 et al., 2013) to reconstruct the mitogenome of the strains that were pooled before sequencing. GRABb  
4 was chosen because it is a wrapper program for iterative *de novo* assembly based on a reference sequence.  
5 SPAdes assembler was used, since it offers good insight for the user into the relationship between nodes  
6 in the assembly graph and the relationship between nodes, contigs and scaffolds. When GRABb finished  
7 the assembly process, the final assembly graph (Fig. 1) was visualized using Bandage (Wick et al., 2015).

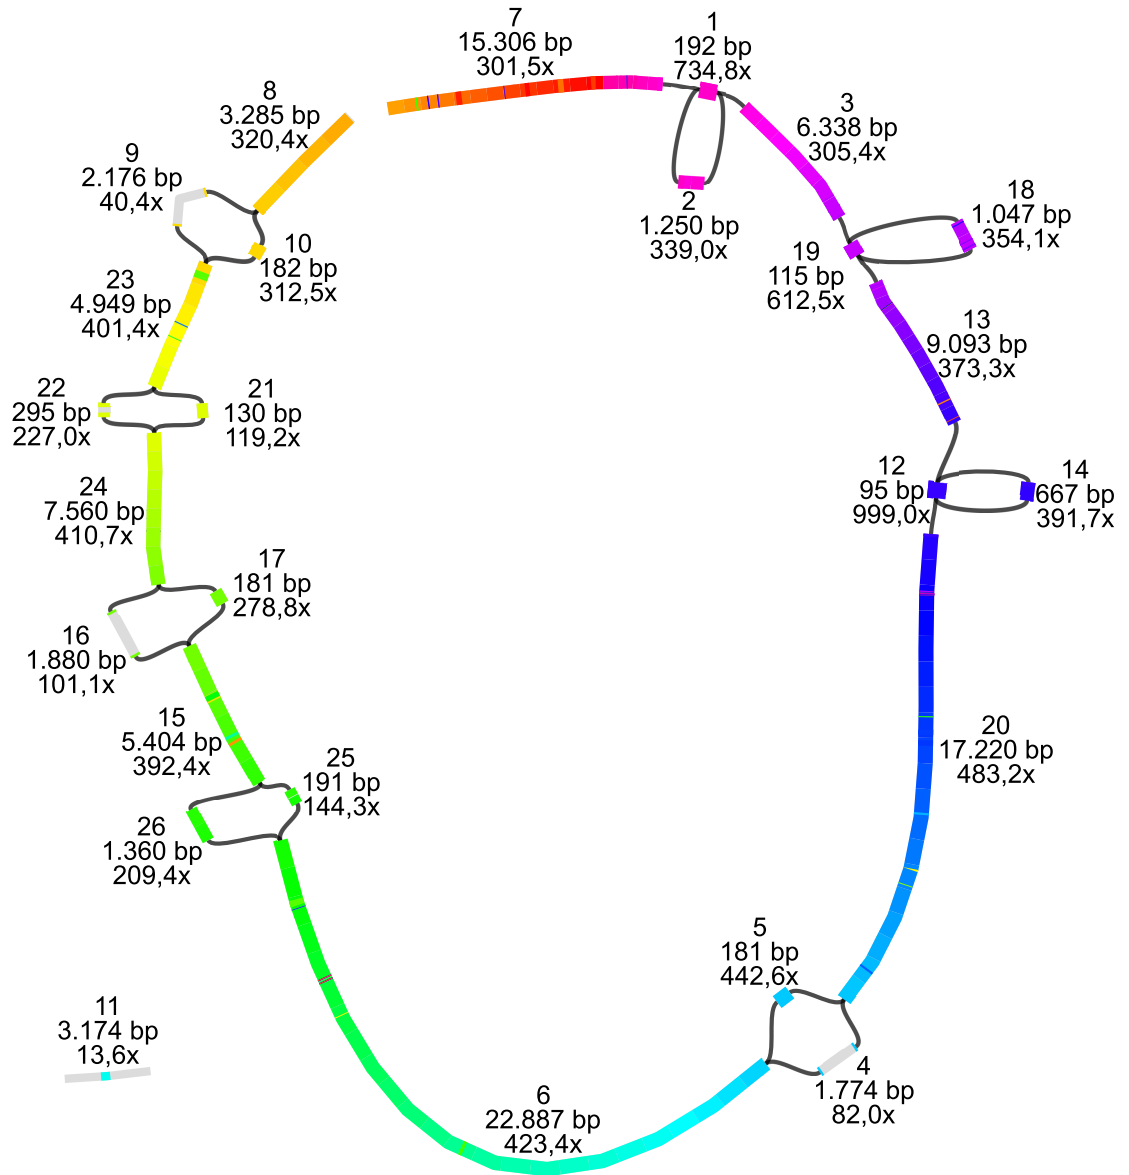

**Figure 1. Assembly graph of the pooled dataset.** The image was created using Bandage (after running BLAST against the mitogenome of PH-1). The nodes were colored by Bandage using the BLAST hits (rainbow) setting. Node 11 represents a NUMT (nuclear mitochondrial DNA segment).

8 The loops observed at nodes 1, 12 and 19 were short repeat regions, these were resolved by SPAdes  
9 when creating the *contigs.fasta* file. Node 11 represented a nuclear mitochondrial sequence (NUMT).  
10 This could be estimated based on its coverage value (13.6x). BLASTN analysis showed that this sequence  
11 part of chromosome 1 of the PH-1 genome. Nodes 9 and 10, 16 and 17, 21 and 22, 25 and 26 represent  
12 alternative alleles. The sum of the coverage values of the allele pairs is approximately equal to the  
13 coverage values of the mono-morphic regions. The polymorphic regions were too far apart to establish

14 linkage between them, so in order to capture the sequence diversity found in the dataset two alternative  
15 assemblies (“short” and “long”) were extracted from the graph: one with the shorter allele at all of the  
16 positions and one with the longer allele at all of the positions (Supplementary Table 1). Both of the two  
17 sequences could be circularized, because the sequences of nodes 7 and 8 showed 185 bp long overlap. The  
18 overlapping region contained 3 SNPs that needed to be resolved by read mapping to identify the correct  
19 nucleotide for those positions. These were also confirmed when compared to the mitogenome sequence of  
20 PH-1 strain. The assembly method did not reveal SNP variations, only intron presence/absence variations  
21 and an alternative idiomorph variation.

## 22 REFERENCES

- 23 Bankevich, A., Nurk, S., Antipov, D., Gurevich, A. A., Dvorkin, M., Kulikov, A. S., Lesin, V. M.,  
24 Nikolenko, S. I., Pham, S., Prjibelski, A. D., Pyshkin, A. V., Sirotkin, A. V., Vyahhi, N., Tesler, G.,  
25 Alekseyev, M. A., and Pevzner, P. A. (2012). SPAdes: A new genome assembly algorithm and its  
26 applications to single-cell sequencing. *Journal of Computational Biology*, 19(5):455–477.
- 27 Brankovics, B., Zhang, H., van Diepeningen, A. D., van der Lee, T. A. J., Waalwijk, C., and de Hoog,  
28 G. S. (2016). GRAB: Selective assembly of genomic regions, a new niche for genomic research. *PLoS*  
29 *Comput Biol.*, 12(6):e1004753.
- 30 Nurk, S., Bankevich, A., Antipov, D., Gurevich, A. A., Korobeynikov, A., Lapidus, A., Prjibelski, A. D.,  
31 Pyshkin, A., Sirotkin, A., Sirotkin, Y., Stepanauskas, R., Clingenpeel, S. R., Woyke, T., McLean,  
32 J. S., Lasken, R., Tesler, G., Alekseyev, M. A., and Pevzner, P. A. (2013). Assembling single-cell  
33 genomes and mini-metagenomes from chimeric MDA products. *Journal of Computational Biology*,  
34 20(10):714–37.
- 35 Wick, R. R., Schultz, M. B., Zobel, J., and Holt, K. E. (2015). Bandage: Interactive visualization of *de*  
36 *novo* genome assemblies. *Bioinformatics*, 31(20):3350–3352.
